# Supplementary material for: Clinical efficacy of Professional Continuous Glucose Monitoring in improving glycemic control among children with Type 1 Diabetes Mellitus: An Open-label Randomized Control Trial
Source: PubMed Central journal article supplement (PMC6467868; doi:10.1038/s41598-019-42555-6), 2019-04-16
Supplement: 41598_2019_42555_MOESM2_ESM.pdf [file 41598_2019_42555_MOESM2_ESM.pdf]

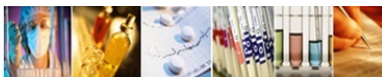

Clinical Trial Details (PDF Generation Date :- Thu, 24 Jan 2019 07:20:38 GMT)

|                                                                                            |                                                                                                                                                                   |                                                                                                   |
|--------------------------------------------------------------------------------------------|-------------------------------------------------------------------------------------------------------------------------------------------------------------------|---------------------------------------------------------------------------------------------------|
| <b>CTRI Number</b>                                                                         | CTRI/2017/02/007937 [Registered on: 21/02/2017] - <b>Trial Registered Retrospectively</b>                                                                         |                                                                                                   |
| <b>Last Modified On</b>                                                                    | 15/02/2017                                                                                                                                                        |                                                                                                   |
| <b>Post Graduate Thesis</b>                                                                | Yes                                                                                                                                                               |                                                                                                   |
| <b>Type of Trial</b>                                                                       | Interventional                                                                                                                                                    |                                                                                                   |
| <b>Type of Study</b>                                                                       | Medical Device                                                                                                                                                    |                                                                                                   |
| <b>Study Design</b>                                                                        | Randomized, Parallel Group Trial                                                                                                                                  |                                                                                                   |
| <b>Public Title of Study</b>                                                               | Professional Continuous Glucose Monitoring versus Self-Monitoring of Blood Glucose in children with Type 1 Diabetes Mellitus                                      |                                                                                                   |
| <b>Scientific Title of Study</b>                                                           | Professional Continuous Glucose Monitoring and self monitoring of blood glucose in children with Type 1 Diabetes Mellitus: an Open Label Randomized Control Trial |                                                                                                   |
| <b>Secondary IDs if Any</b>                                                                | <b>Secondary ID</b>                                                                                                                                               | <b>Identifier</b>                                                                                 |
|                                                                                            | NIL                                                                                                                                                               | NIL                                                                                               |
| <b>Details of Principal Investigator or overall Trial Coordinator (multi-center study)</b> | <b>Details of Principal Investigator</b>                                                                                                                          |                                                                                                   |
|                                                                                            | <b>Name</b>                                                                                                                                                       | Dr Rakesh Kumar                                                                                   |
|                                                                                            | <b>Designation</b>                                                                                                                                                | Assoc. Professor                                                                                  |
|                                                                                            | <b>Affiliation</b>                                                                                                                                                | PGIMER,, Chandigarh                                                                               |
|                                                                                            | <b>Address</b>                                                                                                                                                    | Deptt of Pediatrics, PGIMER, Sector 12, Chandigarh<br>Chandigarh<br>CHANDIGARH<br>160012<br>India |
|                                                                                            | <b>Phone</b>                                                                                                                                                      |                                                                                                   |
|                                                                                            | <b>Fax</b>                                                                                                                                                        |                                                                                                   |
|                                                                                            | <b>Email</b>                                                                                                                                                      | drakesh.pgi@gmail.com                                                                             |
| <b>Details Contact Person (Scientific Query)</b>                                           | <b>Details Contact Person (Scientific Query)</b>                                                                                                                  |                                                                                                   |
|                                                                                            | <b>Name</b>                                                                                                                                                       | Dr KV Ravi Teja                                                                                   |
|                                                                                            | <b>Designation</b>                                                                                                                                                | PG student, Pediatrics                                                                            |
|                                                                                            | <b>Affiliation</b>                                                                                                                                                | PGIMER,, Chandigarh                                                                               |
|                                                                                            | <b>Address</b>                                                                                                                                                    | Deptt of Pediatrics, PGIMER, Sector 12, Chandigarh<br>Chandigarh<br>CHANDIGARH<br>160012<br>India |
|                                                                                            | <b>Phone</b>                                                                                                                                                      | 91-8195862345                                                                                     |
|                                                                                            | <b>Fax</b>                                                                                                                                                        |                                                                                                   |
|                                                                                            | <b>Email</b>                                                                                                                                                      | kvraitheja@gmail.com                                                                              |
| <b>Details Contact Person (Public Query)</b>                                               | <b>Details Contact Person (Public Query)</b>                                                                                                                      |                                                                                                   |
|                                                                                            | <b>Name</b>                                                                                                                                                       | Dr Rakesh Kumar                                                                                   |
|                                                                                            | <b>Designation</b>                                                                                                                                                | Assoc. Professor                                                                                  |
|                                                                                            | <b>Affiliation</b>                                                                                                                                                | PGIMER,, Chandigarh                                                                               |
|                                                                                            | <b>Address</b>                                                                                                                                                    | Deptt of Pediatrics, PGIMER, Sector 12, Chandigarh<br>Chandigarh<br>CHANDIGARH<br>160012<br>India |
|                                                                                            | <b>Phone</b>                                                                                                                                                      |                                                                                                   |
|                                                                                            | <b>Fax</b>                                                                                                                                                        |                                                                                                   |
|                                                                                            | <b>Email</b>                                                                                                                                                      | drakesh.pgi@gmail.com                                                                             |



|                                               |                                                                                                                         |                                                                                                                                                                                                                                     |                                                                                                                                                      |                                         |
|-----------------------------------------------|-------------------------------------------------------------------------------------------------------------------------|-------------------------------------------------------------------------------------------------------------------------------------------------------------------------------------------------------------------------------------|------------------------------------------------------------------------------------------------------------------------------------------------------|-----------------------------------------|
| <b>Source of Monetary or Material Support</b> | <b>Source of Monetary or Material Support</b>                                                                           |                                                                                                                                                                                                                                     |                                                                                                                                                      |                                         |
|                                               | > Institute Thesis Grant through Head Of Deptt., Deptt of Pediatrics, APC Building Level 3A, PGIMER, Chandigarh. 160012 |                                                                                                                                                                                                                                     |                                                                                                                                                      |                                         |
| <b>Primary Sponsor</b>                        | <b>Primary Sponsor Details</b>                                                                                          |                                                                                                                                                                                                                                     |                                                                                                                                                      |                                         |
|                                               | <b>Name</b>                                                                                                             | PGIMER Chandigarh                                                                                                                                                                                                                   |                                                                                                                                                      |                                         |
|                                               | <b>Address</b>                                                                                                          | Director, PGIMER, Chandigarh, Sector 12, Chandigahr UT 160012                                                                                                                                                                       |                                                                                                                                                      |                                         |
|                                               | <b>Type of Sponsor</b>                                                                                                  | Research institution and hospital                                                                                                                                                                                                   |                                                                                                                                                      |                                         |
| <b>Details of Secondary Sponsor</b>           | <b>Name</b>                                                                                                             | <b>Address</b>                                                                                                                                                                                                                      |                                                                                                                                                      |                                         |
|                                               | NIL                                                                                                                     | NIL                                                                                                                                                                                                                                 |                                                                                                                                                      |                                         |
| <b>Countries of Recruitment</b>               | <b>List of Countries</b>                                                                                                |                                                                                                                                                                                                                                     |                                                                                                                                                      |                                         |
|                                               | India                                                                                                                   |                                                                                                                                                                                                                                     |                                                                                                                                                      |                                         |
| <b>Sites of Study</b>                         | <b>Name of Principal Investigator</b>                                                                                   | <b>Name of Site</b>                                                                                                                                                                                                                 | <b>Site Address</b>                                                                                                                                  | <b>Phone/Fax/Email</b>                  |
|                                               | Dr Rakesh Kumar                                                                                                         | PGIMER, Chandigarh                                                                                                                                                                                                                  | Room No 3117, Level 3A, Deptt of Pediatrics, APC Building Chandigarh CHANDIGARH                                                                      | 7087008480<br>drrakesh.pgi@gmail.com    |
| <b>Details of Ethics Committee</b>            | <b>Name of Committee</b>                                                                                                | <b>Approval Status</b>                                                                                                                                                                                                              | <b>Date of Approval</b>                                                                                                                              | <b>Is Independent Ethics Committee?</b> |
|                                               | Institute Ethic Committee (Intramural), PGIMER, Chandigarh                                                              | Approved                                                                                                                                                                                                                            | 03/09/2014                                                                                                                                           | No                                      |
| <b>Regulatory Clearance Status from DCGI</b>  | <b>Status</b>                                                                                                           |                                                                                                                                                                                                                                     | <b>Date</b>                                                                                                                                          |                                         |
|                                               | Not Applicable                                                                                                          |                                                                                                                                                                                                                                     | No Date Specified                                                                                                                                    |                                         |
| <b>Health Condition / Problems Studied</b>    | <b>Health Type</b>                                                                                                      |                                                                                                                                                                                                                                     | <b>Condition</b>                                                                                                                                     |                                         |
|                                               | Patients                                                                                                                |                                                                                                                                                                                                                                     | Type 1 Diabetes Mellitus                                                                                                                             |                                         |
| <b>Intervention / Comparator Agent</b>        | <b>Type</b>                                                                                                             | <b>Name</b>                                                                                                                                                                                                                         | <b>Details</b>                                                                                                                                       |                                         |
|                                               | Comparator Agent                                                                                                        | Self monitoring of blood glucose (SMBG) by glucometer                                                                                                                                                                               | Treatment is guided /modified only on basis of SMBG by patients                                                                                      |                                         |
|                                               | Intervention                                                                                                            | Professional Continous Glucose monitoring (CGM) by a device for 3-5days PLUS Self monitoring of Blood Glucose (SMBG) by glucometer                                                                                                  | Treatment is guided/modified by result of Professional CGM AND SMBG both. SMBG will be continued as in comparator and CGM will be done for 3-5 days. |                                         |
| <b>Inclusion Criteria</b>                     | <b>Inclusion Criteria</b>                                                                                               |                                                                                                                                                                                                                                     |                                                                                                                                                      |                                         |
|                                               | <b>Age From</b>                                                                                                         | 2.00 Year(s)                                                                                                                                                                                                                        |                                                                                                                                                      |                                         |
|                                               | <b>Age To</b>                                                                                                           | 10.00 Year(s)                                                                                                                                                                                                                       |                                                                                                                                                      |                                         |
|                                               | <b>Gender</b>                                                                                                           | Both                                                                                                                                                                                                                                |                                                                                                                                                      |                                         |
|                                               | <b>Details</b>                                                                                                          | 1. Children with a diagnosis of Type 1 DM for at least 6 month<br>2. Age between 2 to 10 years.<br>3. Patients on basal-bolus regimen with insulin analogues with 3-4 injections per day and doing SMBG at least 3-4 times per day. |                                                                                                                                                      |                                         |
| <b>Exclusion Criteria</b>                     | <b>Exclusion Criteria</b>                                                                                               |                                                                                                                                                                                                                                     |                                                                                                                                                      |                                         |
|                                               | <b>Details</b>                                                                                                          | 1. Children with history of acute metabolic decompensation such as DKA within previous 2 months.<br>2. Children on chronic medications known to affect blood glucose such as systemic corticosteroids.                              |                                                                                                                                                      |                                         |



|                                               | 3. Patients with known poor compliance and HbA1c >12%.                                                                                                                                                                                                                                                                                                                                                                                                                                                                                                                               |            |            |                                               |                            |
|-----------------------------------------------|--------------------------------------------------------------------------------------------------------------------------------------------------------------------------------------------------------------------------------------------------------------------------------------------------------------------------------------------------------------------------------------------------------------------------------------------------------------------------------------------------------------------------------------------------------------------------------------|------------|------------|-----------------------------------------------|----------------------------|
| <b>Method of Generating Random Sequence</b>   | Computer generated randomization                                                                                                                                                                                                                                                                                                                                                                                                                                                                                                                                                     |            |            |                                               |                            |
| <b>Method of Concealment</b>                  | Sequentially numbered, sealed, opaque envelopes                                                                                                                                                                                                                                                                                                                                                                                                                                                                                                                                      |            |            |                                               |                            |
| <b>Blinding/Masking</b>                       | Open Label                                                                                                                                                                                                                                                                                                                                                                                                                                                                                                                                                                           |            |            |                                               |                            |
| <b>Primary Outcome</b>                        | <table border="1"> <thead> <tr> <th>Outcome</th> <th>Timepoints</th> </tr> </thead> <tbody> <tr> <td>Unit Change in HbA1c values</td> <td>3 months post intervention</td> </tr> </tbody> </table>                                                                                                                                                                                                                                                                                                                                                                                    | Outcome    | Timepoints | Unit Change in HbA1c values                   | 3 months post intervention |
|                                               | Outcome                                                                                                                                                                                                                                                                                                                                                                                                                                                                                                                                                                              | Timepoints |            |                                               |                            |
| Unit Change in HbA1c values                   | 3 months post intervention                                                                                                                                                                                                                                                                                                                                                                                                                                                                                                                                                           |            |            |                                               |                            |
| <b>Secondary Outcome</b>                      | <table border="1"> <thead> <tr> <th>Outcome</th> <th>Timepoints</th> </tr> </thead> <tbody> <tr> <td>Frequency of Low and high blood sugar records</td> <td>3 months post treatment</td> </tr> </tbody> </table>                                                                                                                                                                                                                                                                                                                                                                     | Outcome    | Timepoints | Frequency of Low and high blood sugar records | 3 months post treatment    |
|                                               | Outcome                                                                                                                                                                                                                                                                                                                                                                                                                                                                                                                                                                              | Timepoints |            |                                               |                            |
| Frequency of Low and high blood sugar records | 3 months post treatment                                                                                                                                                                                                                                                                                                                                                                                                                                                                                                                                                              |            |            |                                               |                            |
| <b>Target Sample Size</b>                     | <b>Total Sample Size=70</b><br><b>Sample Size from India=70</b>                                                                                                                                                                                                                                                                                                                                                                                                                                                                                                                      |            |            |                                               |                            |
| <b>Phase of Trial</b>                         | N/A                                                                                                                                                                                                                                                                                                                                                                                                                                                                                                                                                                                  |            |            |                                               |                            |
| <b>Date of First Enrollment (India)</b>       | 14/02/2015                                                                                                                                                                                                                                                                                                                                                                                                                                                                                                                                                                           |            |            |                                               |                            |
| <b>Date of First Enrollment (Global)</b>      | No Date Specified                                                                                                                                                                                                                                                                                                                                                                                                                                                                                                                                                                    |            |            |                                               |                            |
| <b>Estimated Duration of Trial</b>            | <b>Years=0</b><br><b>Months=9</b><br><b>Days=0</b>                                                                                                                                                                                                                                                                                                                                                                                                                                                                                                                                   |            |            |                                               |                            |
| <b>Recruitment Status of Trial (Global)</b>   | Not Applicable                                                                                                                                                                                                                                                                                                                                                                                                                                                                                                                                                                       |            |            |                                               |                            |
| <b>Recruitment Status of Trial (India)</b>    | Completed                                                                                                                                                                                                                                                                                                                                                                                                                                                                                                                                                                            |            |            |                                               |                            |
| <b>Publication Details</b>                    | none                                                                                                                                                                                                                                                                                                                                                                                                                                                                                                                                                                                 |            |            |                                               |                            |
| <b>Brief Summary</b>                          | <p><b>Primary objective:</b></p> <ol style="list-style-type: none"> <li>To assess efficacy of treatment modulation based on professional CGM (done over 3 days) in improving glycemic control compared to self-monitoring blood glucose.</li> </ol> <p><b>Secondary Objectives:</b></p> <ol style="list-style-type: none"> <li>To assess feasibility and acceptability of professional CGM in diabetic children between 2 to 10 years of age.</li> <li>Efficacy of professional CGM in reducing hypoglycemic and hyperglycemic episodes.</li> </ol> <p><b>RESEARCH QUESTION:</b></p> |            |            |                                               |                            |

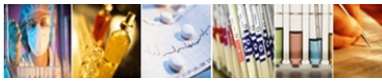

Whether in children with Type1 DM, professional CGM along with SMBG decreases HbA1c significantly over 3-4 months when compared to SMBG alone?

**Hypothesis:** Professional CGM when combined with SMBG, improves HbA1c in Type1 diabetic children (2 to 10 years old) when compared to SMBG alone.
